# Supplementary material
Source: PubMed Central journal article supplement (PMC3883767)
Supplement: epi-8-899-s01.pdf [file epi-8-899-s01.pdf]

## **Supplemental Material to:**

**Kentaro Hirose, Nobuyoshi Shimoda, and Yutaka Kikuchi**

**Transient reduction of 5-methylcytosine and  
5-hydroxymethylcytosine is associated with active DNA  
demethylation during regeneration of zebrafish fin**

**Epigenetics 2013; 8(9)**

**<http://dx.doi.org/10.4161/epi.25653>**

**[http://www.landesbioscience.com/journals/epigenetics/  
article/25653/](http://www.landesbioscience.com/journals/epigenetics/article/25653/)**

**Transient reduction of 5-methylcytosine and 5-hydroxymethylcytosine  
is associated with active DNA demethylation during regeneration of  
zebrafish fin**

**Kentaro Hirose<sup>1</sup>, Nobuyoshi Shimoda<sup>2</sup> and Yutaka Kikuchi<sup>1\*</sup>**

1. Department of Biological Science, Graduate School of Science, Hiroshima University,  
Kagamiyama 1-3-1, Higashi-Hiroshima, Hiroshima, 739-8526 Japan.

2. Department of Regenerative Medicine, National Institute for Longevity Sciences,  
National Center for Geriatrics and Gerontology, 36-3 Gengo, Morioka, Oobu, Aichi  
474-8522, Japan.

Key Words: zebrafish, fin regeneration, 5-methylcytosine, 5-hydroxymethylcytosine,  
active DNA demethylation,

Abbreviations: 5mC, 5-methylcytosine; 5hmC, 5-hydroxymethylcytosine;

\*Correspondence to: Yutaka Kikuchi: E-mail [yutaka@hiroshima-u.ac.jp](mailto:yutaka@hiroshima-u.ac.jp)

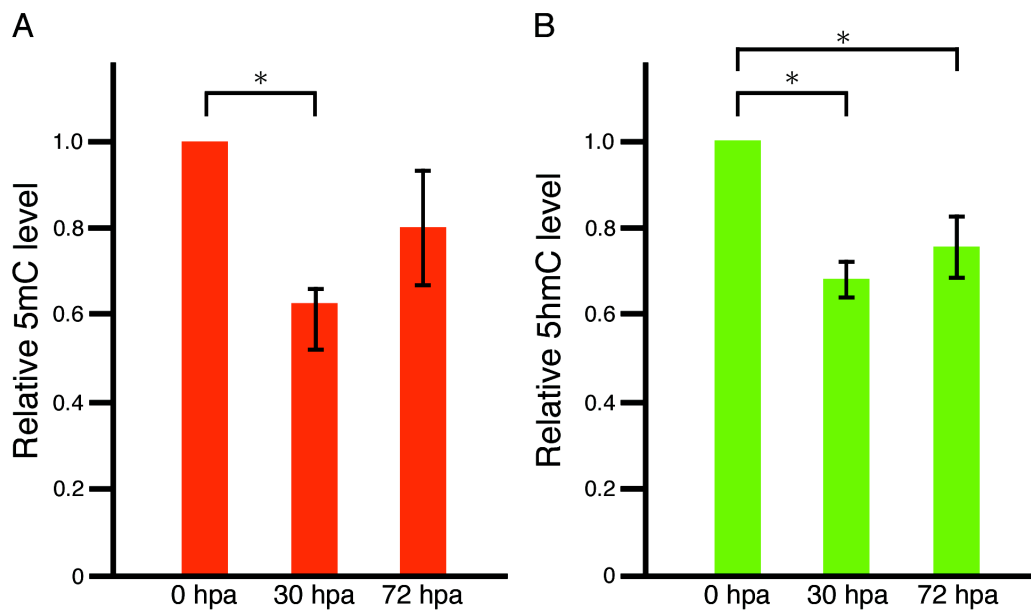

**Fig. S1. Quantification of 5mC and 5hmC levels during regeneration of zebrafish**

**fin**

(A, B) Relative levels of 5mC and 5hmC at 30 and 72 hpa compared with those at 0 hpa.

Average signal intensity for 5mC or 5hmC at 0 hpa is set as 1.0. \*  $p < 0.001$  by Student's  $t$ -

test. Error bars represent the standard error.

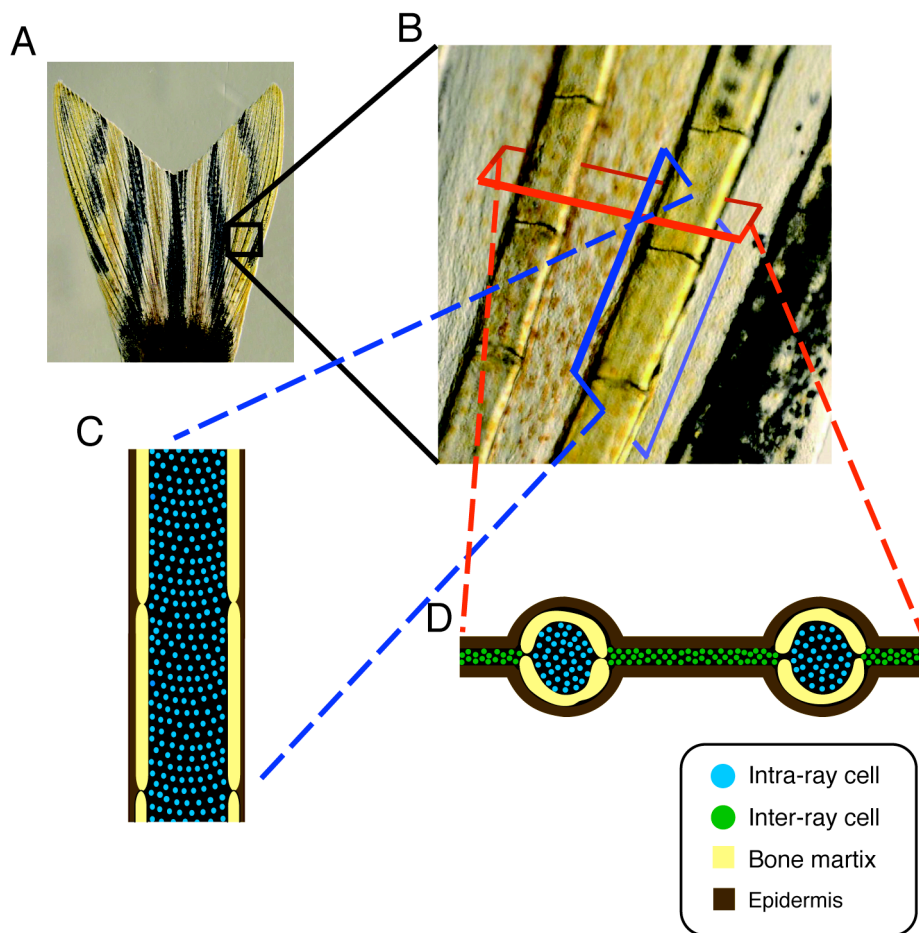

**Fig. S2. Structure of adult zebrafish caudal fin**

(A, B) A picture of adult zebrafish caudal fin (A) and an enlarged image of fin rays (B). (C)

Longitudinal section of a fin ray. (D) Cross section of 2 fin rays.

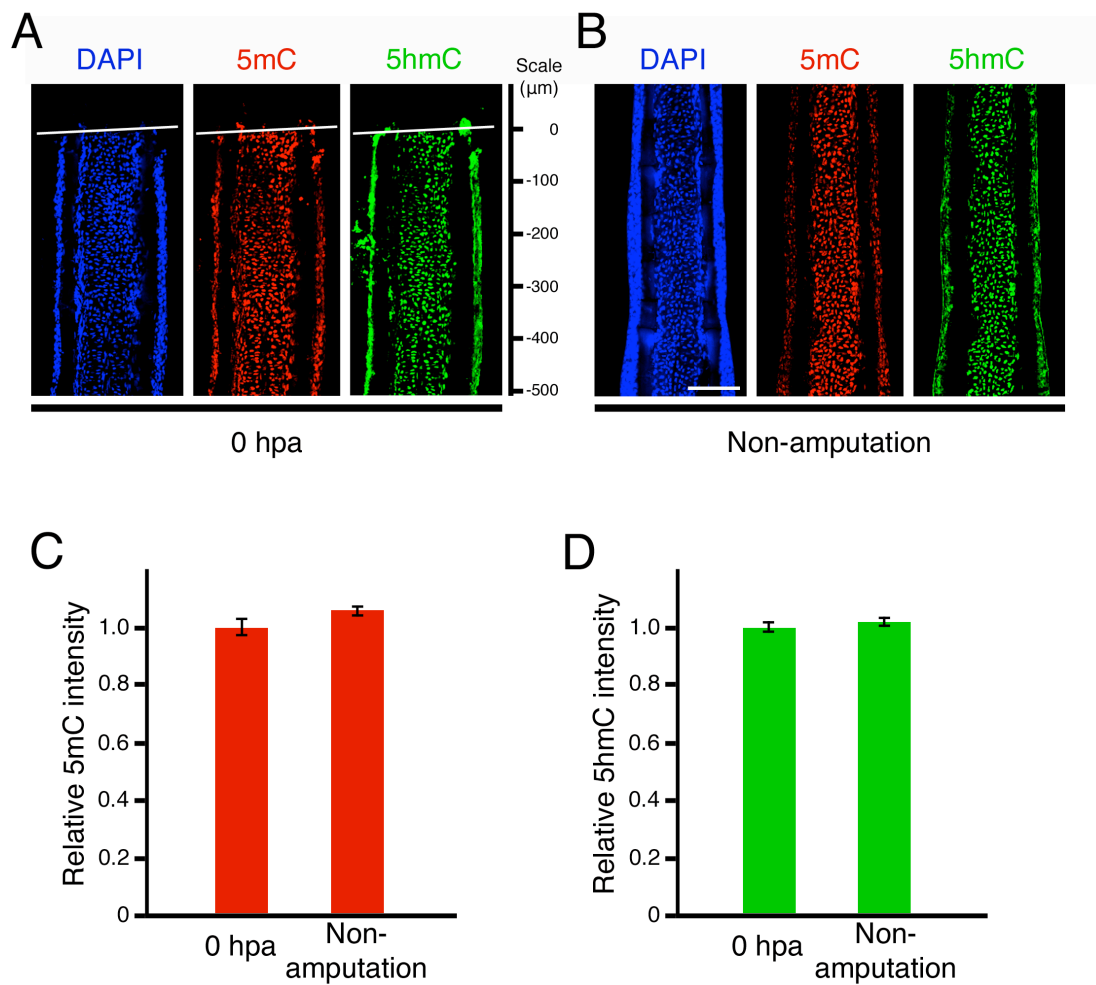

**Fig. S3. The relative 5mC or 5hmC level did not differ between fins at 0 hpa and non-amputated ones**

(A, B) Longitudinal sections of a fin at 0 hpa (A) and a non-amputated fin (B) that were immunohistochemically stained with antibodies against 5mC (red) and 5hmC (green). The fluorescent signals of DAPI (blue) indicate the presence of nuclei. The intensity of DAPI, 5mC, or 5hmC was shown at the approximate two-thirds position of the fins, which was a common amputation site in this study (B). (C, D) Quantification of the relative fluorescent signal of 5mC or 5hmC in fins at 0 hpa and in non-amputated fins. The relative level of 5mC

or 5hmC did not vary between non-amputated fins and those at 0 hpa. White lines indicate the amputation planes. Scale bars represent 100  $\mu\text{m}$ . \*  $p < 0.001$  by Student's  $t$ - test.

Error bars represent the standard error.

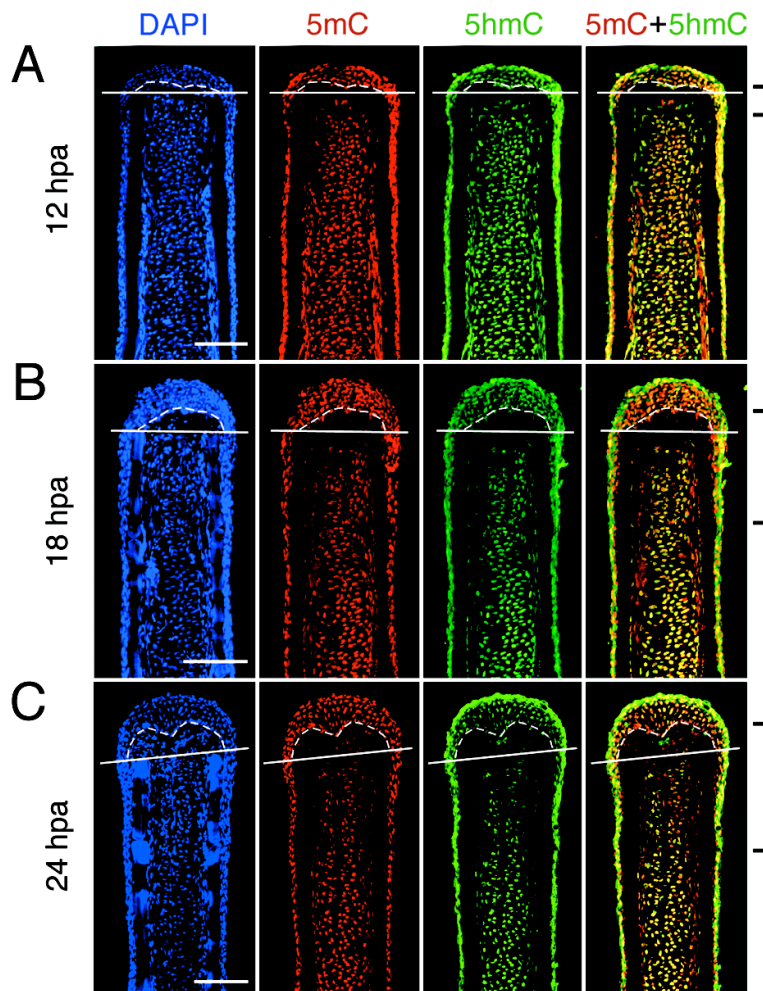

**Fig. S4. Reduction of 5mC and 5hmC levels during regeneration of zebrafish fin**

(A-C) Longitudinal sections of wild-type fin regenerates that were immunohistochemically stained with antibodies against 5mC (red) and 5hmC (green) at 12 (A), 18 (B), and 24 hpa (C). Blastema cells and cells adjacent to the amputation plane showed reduced levels of 5mC and 5hmC (brackets in A, B, C). The fluorescent signals of DAPI (blue) indicate the presence of nuclei. White lines indicate the amputation planes. Dashed lines outline the basement membrane, which shows the boundary between the epidermis and blastema. Scale bars represent 100  $\mu\text{m}$ .

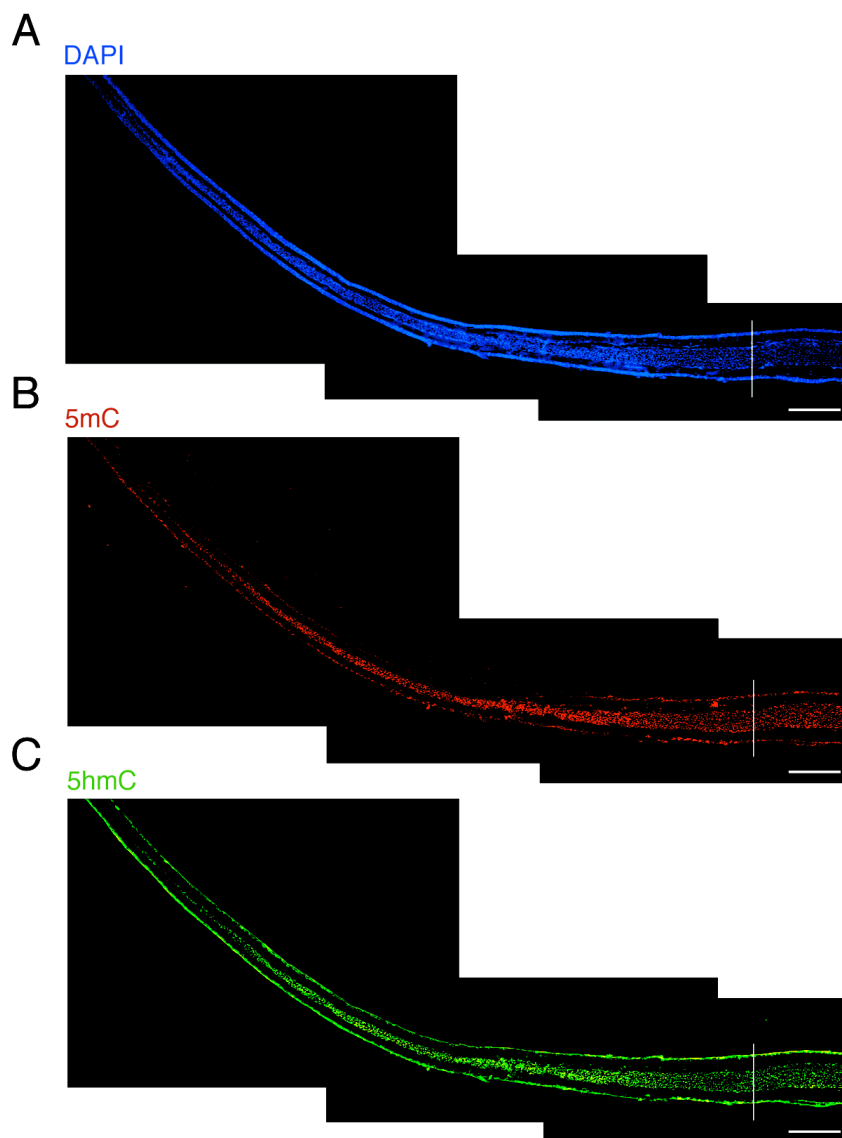

**Fig. S5. Distributions of 5mC and 5hmC at 14 dpa**

(A-C) Longitudinal sections of wild-type fin regenerates that were immunohistochemically stained with antibodies against 5mC (B) and 5hmC (C) at 14 dpa. The fluorescent signals of DAPI (A) indicate the presence of nuclei. White lines indicate the putative amputation planes. Scale bars represent 200 μm.



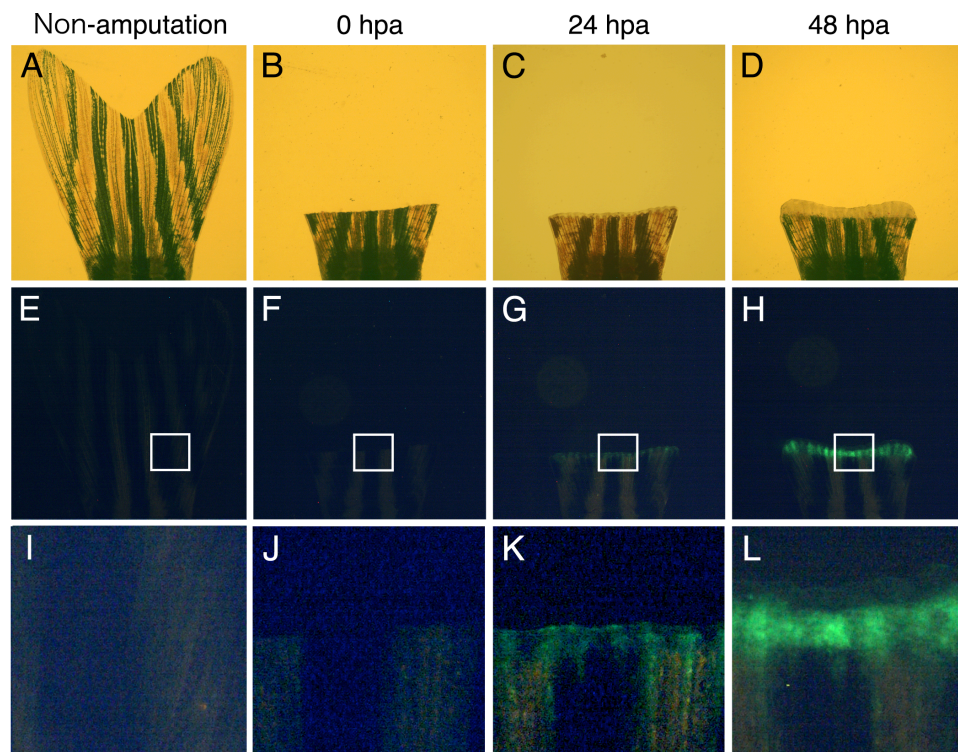

**Fig. S6. The EGFP fluorescence of Tg(*efl-α:EGFP*) transgenic fish was not detected before amputation or at 0 hpa.**

(A-D) Bright field images of Tg(*efl-α:EGFP*) transgenic fish fins before and after amputation. (E-L) Fluorescence images of Tg(*efl-α:EGFP*) transgenic fish fins before and after amputation. The boxed areas in E, F, G, and H are shown enlarged in I, J, K, and L, respectively. No EGFP fluorescence was detected before amputation, or at 0 hpa (E, F, I, J). Scale bars represent 100  $\mu$ m.

Supplementary Table : Primer sequences and PCR conditions

| Gene            | Sequence                             | Ref. | Annealing temperature |
|-----------------|--------------------------------------|------|-----------------------|
| <i>gadd45ba</i> | forward: TCTCACAGTCGGCGTTTATG        | 1    | 56°C                  |
|                 | reverse: CGGCTCTCCTCACAGTAGGT        |      |                       |
| <i>gadd45bb</i> | forward: GATCCACTTCACGCTCATCCA       | 2    | 56°C                  |
|                 | reverse: GGCAATAGAAGGCACCCACTG       |      |                       |
| <i>gadd45g</i>  | forward: CAACGACATCAACATCGTTTCG      | 1    | 56°C                  |
|                 | reverse: TCAGCGTTCAGGCAGAGTAA        |      |                       |
| <i>apobec2b</i> | forward: ACATACAAGGTGGAGCAGCAGAG     |      | 60°C                  |
|                 | reverse: AAATCCACAGGCCTCATCATGCG     |      |                       |
| <i>tdg</i>      | forward: ATGGATGAAAGGCTGTATGGATC     | 1    | 60°C                  |
|                 | reverse: TCCTCTGGATGTACAGGCAT        |      |                       |
| <i>mbd4</i>     | forward: CTTCTGCTCAGCGTTCACAACTC     |      | 60°C                  |
|                 | reverse: CATGGCTCTGTGCAGATCTTCAC     |      |                       |
| <i>tet2</i>     | forward: CACACCCAACTCTAAAACGGACAACAC | 2    | 60°C                  |
|                 | reverse: ATGGTGGGGAAGCGTAAGAAGGA     |      |                       |
| <i>tet3</i>     | forward: GGACTGTCGTCTGGGCTGTAGGG     | 2    | 62°C                  |
|                 | reverse: GCCAGCAGCCGCACTTCTCTT       |      |                       |
| <i>parp1</i>    | forward: ATCAGACGTCTCTGTGGTGAGAC     |      | 60°C                  |
|                 | reverse: CTTGCAGCAGGCTATATCCTAGC     |      |                       |
| <i>actb1</i>    | forward: CCGTGACATCAAGGAGAAGCT       |      | 60°C                  |
|                 | reverse: TCATGGATACCGCAAGATTCC       |      |                       |
| <i>rpl13a</i>   | forward: TCTGGAGGACTGTAAGAGGTATGC    | 3    | 56°C                  |
|                 | reverse: AGACGCACAATCTTGAGAGCAG      |      |                       |
| <i>apobec2a</i> | forward: TCAAGAACGTGGAGTACTCGTCC     |      | 58°C                  |
|                 | reverse: TTCCAAGTGTGTGCGTCTGACTAG    |      |                       |
| <i>aid</i>      | forward: GACGGTGCAAGATTGTGTTAC       |      | 56°C                  |
|                 | reverse: TAAGTCATGACCGAGATCTGAAC     |      |                       |

## References

1. Rai K, Huggins IJ, James SR, Karpf AR, Jones DA, Cairns BR. DNA demethylation in zebrafish involves the coupling of a deaminase, a glycosylase, and gadd45. *Cell* 2008; 135:1201-12.
2. Powell C, Elsaiedi F, Goldman D. Injury-dependent Müller glia and ganglion cell reprogramming during tissue regeneration requires Apobec2a and Apobec2b. *J Neurosci* 2012; 32:1096-109.
3. Tang R, Dodd A, Lai D, McNabb WC, Love DR. Validation of zebrafish (*Danio rerio*) reference genes for quantitative real-time RT-PCR normalization. *Acta Biochim Biophys Sin (Shanghai)* 2007; 39:384-90.
